# Supplementary material for: Costunolide Influences Germ Tube Orientation in Sunflower Broomrape – A First Step Toward Understanding Chemotropism
Source: Front Plant Sci. 2021 Aug 13;12:699068. doi: 10.3389/fpls.2021.699068 (PMC8414798; doi:10.3389/fpls.2021.699068)
Supplement: Supplementary Table 1 — Chemotropism data from root chambers and chemotropism bioassays. [file Table_1.XLSX]

## Sheet: Suppl Tab 1
										data excluding germtubes without clear curving			positively curved germ-tubes [mean]	positively curved germ-tubes [standard deviation]	negatively curved germ-tubes [mean]	negatively curved germ-tubes [standard deviation]	data depicted in Figure
tested substance	all seeds [n]	germinated seeds [n]	positively curved germ-tubes [n]	negatively curved germ-tubes [n]	germ-tubes without clear curving [n]	germinated seeds [%]	positively curved germ-tubes [%]	negatively curved germ-tubes [%]	germ-tubes without clear curving [%]	positively curved germ-tubes [%]	negatively curved germ-tubes [%]	number of independent experiments					data depicted in Fig.
root chamber	140	82	25	8	49	58.5714	30.4878	9.7561	59.7561	75.7576	24.2424
root chamber	168	85	33	15	37	50.5952	38.8235	17.6471	43.5294	68.75	31.25
root chamber	191	79	31	15	33	41.3613	39.2405	18.9873	41.7722	67.3913	32.6087
root chamber	90	45	21	7	17	50	46.6667	15.5556	37.7778	75	25
root chamber	40	20	9	2	9	50	45	10	45	81.8182	18.1818
root chamber	88	45	18	5	22	51.1364	40	11.1111	48.8889	78.2609	21.7391
root chamber	31	12	3	1	8	38.7097	25	8.33333	66.6667	75	25	7	74.5683	5.05544	25.4317	5.05544
root exudate	25	6	2	0	4	24	33.3333	0	66.6667	100	0
root exudate	25	10	6	3	1	40	60	30	10	66.6667	33.3333
root exudate	24	8	4	3	1	33.3333	50	37.5	12.5	57.1429	42.8571
root exudate	30	5	2	1	2	16.6667	40	20	40	66.6667	33.3333
root exudate	31	6	3	2	1	19.3548	50	33.3333	16.6667	60	40
root exudate	25	12	6	2	4	48	50	16.6667	33.3333	75	25
root exudate	24	6	3	1	2	25	50	16.6667	33.3333	75	25
root exudate	25	9	2	2	5	36	22.2222	22.2222	55.5556	50	50	8	68.8095	15.2418	31.1905	15.2418	Fig. 3
oil extract	93	39	21	5	13	41.9355	53.8462	12.8205	33.3333	80.7692	19.2308
oil extract	52	17	6	3	8	32.6923	35.2941	17.6471	47.0588	66.6667	33.3333
oil extract	128	119	48	23	48	92.9688	40.3361	19.3277	40.3361	67.6056	32.3944	3	71.6805	7.88505	28.3195	7.88505	Fig. 3
Costunolide 10^-4 M	73	4	2	1	1	5.47945	50	25	25	66.6667	33.3333
Costunolide 10^-4 M	62	7	4	2	1	11.2903	57.1429	28.5714	14.2857	66.6667	33.3333
Costunolide 10^-4 M	14	12	7	1	4	85.7143	58.3333	8.33333	33.3333	87.5	12.5
Costunolide 10^-4 M	25	25	7	5	13	100	28	20	52	58.3333	41.6667
Costunolide 10^-4 M	34	3	2	0	1	8.82353	66.6667	0	33.3333	100	0	5	75.8333	17.2804	24.1667	17.2804	Fig. 3, Fig. 5
Costunolide 10^-5 M	27	11	5	2	4	40.7407	45.4545	18.1818	36.3636	71.4286	28.5714
Costunolide 10^-5 M	26	14	8	3	3	53.8462	57.1429	21.4286	21.4286	72.7273	27.2727
Costunolide 10^-5 M	27	20	10	7	3	74.0741	50	35	15	58.8235	41.1765	3	67.6598	7.67993	32.3402	7.67993	Fig. 5
Costunolide 10^-6 M	24	13	5	7	1	54.1667	38.4615	53.8462	7.69231	41.6667	58.3333
Costunolide 10^-6 M	27	19	7	5	7	70.3704	36.8421	26.3158	36.8421	58.3333	41.6667
Costunolide 10^-6 M	26	25	11	5	9	96.1538	44	20	36	68.75	31.25
Costunolide 10^-6 M	24	13	5	7	1	54.1667	38.4615	53.8462	7.69231	41.6667	58.3333
Costunolide 10^-6 M	27	19	7	5	7	70.3704	36.8421	26.3158	36.8421	58.3333	41.6667
Costunolide 10^-6 M	26	25	11	5	9	96.1538	44	20	36	68.75	31.25	6	56.25	12.2191	43.75	12.2191	Fig. 5
Costunolide 10^-7 M	23	18	6	5	7	78.2609	33.3333	27.7778	38.8889	54.5455	45.4545
Costunolide 10^-7 M	25	7	2	3	2	28	28.5714	42.8571	28.5714	40	60
Costunolide 10^-7 M	25	18	7	3	8	72	38.8889	16.6667	44.4444	70	30
Costunolide 10^-7 M	23	18	6	5	7	78.2609	33.3333	27.7778	38.8889	54.5455	45.4545
Costunolide 10^-7 M	25	7	2	3	2	28	28.5714	42.8571	28.5714	40	60
Costunolide 10^-7 M	25	18	7	3	8	72	38.8889	16.6667	44.4444	70	30	6	54.8485	13.4185	45.1515	13.4185	Fig. 5
GR24	39	24	8	9	7	61.5385	33.3333	37.5	29.1667	47.0588	52.9412
GR24	43	25	7	12	6	58.1395	28	48	24	36.8421	63.1579
GR24	26	16	6	3	7	61.5385	37.5	18.75	43.75	66.6667	33.3333
GR24	30	21	9	7	5	70	42.8571	33.3333	23.8095	56.25	43.75
GR24	30	23	9	9	5	76.6667	39.1304	39.1304	21.7391	50	50
GR24	27	13	6	3	4	48.1481	46.1538	23.0769	30.7692	66.6667	33.3333
GR24	27	13	4	7	2	48.1481	30.7692	53.8462	15.3846	36.3636	63.6364
GR24	25	10	5	2	3	40	50	20	30	71.4286	28.5714
GR24	25	8	4	4	0	32	50	50	0	50	50
GR24	26	7	1	4	2	26.9231	14.2857	57.1429	28.5714	20	80
GR24	26	4	2	2	0	15.3846	50	50	0	50	50
GR24	32	2	1	1	0	6.25	50	50	0	50	50
GR24	67	29	4	9	16	43.2836	13.7931	31.0345	55.1724	30.7692	69.2308
GR24	86	23	5	7	11	26.7442	21.7391	30.4348	47.8261	41.6667	58.3333
GR24	95	32	12	11	9	33.6842	37.5	34.375	28.125	52.1739	47.8261
GR24	74	28	13	11	4	37.8378	46.4286	39.2857	14.2857	54.1667	45.8333
GR24	30	30	6	3	21	100	20	10	70	66.6667	33.3333
GR24	25	24	8	4	12	96	33.3333	16.6667	50	66.6667	33.3333
GR24	35	20	6	8	6	57.1429	30	40	30	42.8571	57.1429	19	50.3286	13.7182	49.6714	13.7182	Fig. 3
GR24 zone 1	67	29	4	9	16	43.2836	13.7931	31.0345	55.1724	30.7692	69.2308
GR24 zone 1	86	23	5	7	11	26.7442	21.7391	30.4348	47.8261	41.6667	58.3333
GR24 zone 1	95	32	12	11	9	33.6842	37.5	34.375	28.125	52.1739	47.8261
GR24 zone 1	74	28	13	11	4	37.8378	46.4286	39.2857	14.2857	54.1667	45.8333
GR24 zone 1	30	30	6	3	21	100	20	10	70	66.6667	33.3333
GR24 zone 1	25	24	8	4	12	96	33.3333	16.6667	50	66.6667	33.3333
GR24 zone 1	35	20	6	8	6	57.1429	30	40	30	42.8571	57.1429	7	50.7096	13.3192	49.2904	13.3192	Fig. 4
GR24 zone 2	67	19	7	4	8	28.3582	36.8421	21.0526	42.1053	63.6364	36.3636
GR24 zone 2	130	42	18	13	11	32.3077	42.8571	30.9524	26.1905	58.0645	41.9355
GR24 zone 2	98	30	7	10	13	30.6122	23.3333	33.3333	43.3333	41.1765	58.8235
GR24 zone 2	87	21	8	5	8	24.1379	38.0952	23.8095	38.0952	61.5385	38.4615
GR24 zone 2	46	17	4	8	5	36.9565	23.5294	47.0588	29.4118	33.3333	66.6667
GR24 zone 2	45	8	2	4	2	17.7778	25	50	25	33.3333	66.6667
GR24 zone 2	51	25	8	1	16	49.0196	32	4	64	88.8889	11.1111	7	54.2816	20.0065	45.7184	20.0065	Fig. 4
Costunolide zone 1	73	4	2	1	1	5.47945	50	25	25	66.6667	33.3333
Costunolide zone 1	62	7	4	2	1	11.2903	57.1429	28.5714	14.2857	66.6667	33.3333
Costunolide zone 1	14	12	7	1	4	85.7143	58.3333	8.33333	33.3333	87.5	12.5
Costunolide zone 1	25	25	7	5	13	100	28	20	52	58.3333	41.6667
Costunolide zone 1	34	3	2	0	1	8.82353	66.6667	0	33.3333	100	0	5	75.8333	17.2804	24.1667	17.2804	Fig. 4
Costunolide zone 2	82	8	3	2	3	9.7561	37.5	25	37.5	60	40
Costunolide zone 2	102	8	2	2	4	7.84314	25	25	50	50	50
Costunolide zone 2	96	9	4	4	1	9.375	44.4444	44.4444	11.1111	50	50
Costunolide zone 2	102	14	3	8	3	13.7255	21.4286	57.1429	21.4286	27.2727	72.7273
Costunolide zone 2	44	8	2	2	4	18.1818	25	25	50	50	50
Costunolide zone 2	43	7	3	2	2	16.2791	42.8571	28.5714	28.5714	60	40
Costunolide zone 2	42	16	2	3	11	38.0952	12.5	18.75	68.75	40	60	7	48.1818	11.4992	51.8182	11.4992	Fig. 4
